# Supplementary material for: An SCN9A channelopathy causes congenital inability to experience pain
Source: Springer Nature journal article supplement (doi:10.1038/nature05413), 2006-12-01
Supplement: 41586_2006_BFnature05413_MOESM1_ESM.pdf [file 41586_2006_BFnature05413_MOESM1_ESM.pdf]

### Supplementary Methods: Cloning

It was necessary to express *SCN9A* with the auxiliary  $\beta_1$  and  $\beta_2$  subunits (encoded by *SCN1B* and *SCN2B*) as the  $\beta$  subunits are needed for normal function of voltage-gated sodium channels. The constructs were designed so that each gene was expressed separately (i.e. not as a fusion protein) through use of internal ribosome entry site (IRES) sequences (Fig. 4a).

The wild-type *SCN9A* → polio IRES → *DsRed2* construct (Fig. 4a) was made as follows. Human fetal brain cDNA was prepared using the Superscript First-Strand Synthesis System for RT-PCR (Invitrogen) using human fetal brain total RNA (Clontech) as template. pcDNA3 (Invitrogen) was rendered a low-copy number vector as previously described (clone name pcDNA3JC)<sup>6</sup>. We and previous authors observed that *SCN9A* appears to be toxic to *E. coli*, thus it was only possible to grow *E. coli* containing the *SCN9A* constructs using such an approach. Human fetal brain cDNA was used to amplify a 2333 bp product (the first third of *SCN9A*) using the forward primer (5' GGG GTA CCC CGT GAG GAG CTG AAG AGG AAT TA) and the reverse primer (5' CCG CTC GAG CGG ATT GGG TGG TGT TCC ATA GC) and Phusion High-Fidelity DNA Polymerase (New England Biolabs). This fragment was digested with *KpnI* and *XhoI* and ligated into pcDNA3JC to generate the clone FLA. A second amplicon (3994 bp) comprising the remaining two-thirds of *SCN9A* was generated using the forward primer (5' TCA GAG GAT ATG CTG AAT GAT C) and the reverse primer (5' CCG CTC GAG CGG CAC TTT CAC AGG CTG TAA ACA) using human fetal brain cDNA as template. Following digestion with *BstXI* and *XhoI* this fragment was ligated into clone FLA to give clone FLB, which contained the complete *SCN9A* open reading frame. To generate the polio IRES-*DsRed2* fragment which follows the *SCN9A* cDNA (Fig. 4a), a fragment from the in-house vector TRIS5EGFP

containing the polio IRES flanked by *Bgl*III and *Age*I sites was cloned into pDsRed2-N1 (Clontech) to give the clone POLRED1. The polio IRES-*DsRed2* fragment was then PCR-amplified out of POLRED1 (1487 bp) using the forward primer (5' CCG CTC GAG CGG CCGCTAGCGCTACCGGACTC) and the reverse primer (5' CTAGA GGGCCC CTA CAG GAA CAG GTG GTG GC). Following digestion with *Xho*I and *Apa*I this fragment was ligated into plasmid FLB to give the final clone FLRED (wild-type *SCN9A* → polio IRES → *DsRed2*). For these cloning steps the ligation reactions were initially transformed into XL-10 Gold Ultracompetent Cells (Stratagene) and single colonies grown up for isolation of DNA using the QIAprep Spin Miniprep Kit (Qiagen). A DNA aliquot was checked by restriction digest and then plasmid DNA was transformed into SURE2 Supercompetent Cells (Stratagene). Resultant single colonies were grown up for DNA isolation using the HiSpeed Plasmid Midi Kit (Qiagen). The final clone (FLRED) was sequenced entirely and corresponds to *SCN9A* RefSeq sequence NM\_002977, the most common splice variant found in dorsal root ganglia<sup>21</sup>. The clone FLRED was used as template to generate the 3 nonsense mutations (Families 1, 2 and 3) using the QuikChange XL Site-Directed Mutagenesis Kit (Stratagene) according to the manufacturer's instructions.

The *SCN1B* → encephalomyocarditis virus (ECMV) IRES → *SCN2B* → polio IRES → *EGFP* construct (Fig. 4a) was made as follows. *SCN2B* was PCR-amplified from human fetal brain cDNA using the forward primer (5' CTG CAG AAC CAC AAC CAT GGA TGC ACA GAG ATG CCT GGC TAC) and the reverse primer (5' GAA GAT CTT CGT CCT AGG TCA CGG GAA GCA C) to generate a 782 bp fragment which was subsequently digested with *Bst*XI and *Bgl*III. The polio IRES-*EGFP* fragment (1488 bp) was cut out of the in-house vector TRIS5EGFP using *Bgl*III and *Not*I. The *SCN2B* and polio IRES-*EGFP* fragments were ligated into the *Bst*XI and *Not*I restriction sites of pIRES2-AcGFP1 (Clontech) to generate the clone JC3. *SCN1B* was PCR-amplified from human fetal brain cDNA using the forward primer (5' CCG CTC GAG CGG GGA CAT TCT AAC CGC CGC

CA) and the reverse primer (5' CGC GGA TCC ACC CCA GTG GCT CCG TCG GCA GG). This 906 bp fragment was digested with *XhoI* and *BamHI* and ligated into clone JC3 to generate clone JC4. The QuikChange Site-Directed Mutagenesis Kit (Stratagene) was used to remove 4 nucleotides derived from the *BstXI* restriction site using the forward primer (5' AAT ATG GCC ACA ACC ATG CAC AGA GAT GCC) and the reverse primer (5' GGC ATC TCT GTG CAT GGT TGT GGC CAT ATT) to generate the final clone JC5 (*SCN1B* → ECMV IRES → *SCN2B* → polio IRES → *EGFP*). This clone was sequenced entirely by standard methods.

### Supplementary Figure 1

Kinetic properties of whole cell wild-type  $\text{Na}_v1.7+\text{Na}_v\beta1+\text{Na}_v\beta2$  currents in HEK293 cells.

- a) Voltage dependence of the activation time constant  $\tau_m$  and inactivation time constant  $\tau_h$ , obtained by fitting current traces elicited by depolarizing pulses from -40 to +40 mV of 50 ms duration from a holding potential of -100 mV (as shown in Fig. 4) with a Hodgkin-Huxley  $m^3h$  model (n=11).
- b) Development of steady-state inactivation. Example currents elicited by a test pulse to -10 mV after a prepulse to -50 mV of increasing duration; the voltage pulse protocol is indicated below. The time course of the peak currents in response to the test pulse were fitted by a single exponential to obtain the inactivation time constant  $\tau_{\text{inact}}$  at -50 mV.
- c) Voltage dependence of  $\tau_{\text{inact}}$ , obtained by fitting data as shown in (b) after prepulses to different potentials (n=12-14).
- d) Recovery from inactivation. Example currents elicited by a test pulse of 20 ms duration to -20 mV after currents were initially inactivated by a similar prepulse and then allowed to recover at -100 mV for increasing time periods; the voltage pulse protocol is indicated below. The time course of the peak current in response to the test pulse was fitted with a single exponential to obtain the recovery time constant  $\tau_{\text{rec}}$  at -100 mV.

e) Voltage dependence of  $\tau_{\text{rec}}$ , obtained by fitting data as shown in (d) after recovery at different potentials (n=7-15).

### Supplementary Figure 2

Alignment of the amino acid sequences of the corresponding common splice variants for the human (NP\_002968) and mouse  $\text{Na}_v1.7$  (XP\_904764) proteins using the LALIGN program (: = identical amino acid; . = similar amino acid). The proteins are highly conserved with 92% identity and 95% similarity. Domain structures are also highly conserved between the human and mouse proteins: the putative transmembrane helices are highlighted in yellow; important residues for ion selectivity are highlighted in turquoise; the IFM motif, which is highlighted in green, is known to be important for fast-inactivation kinetics of other sodium channels; the EF-hand calcium-binding motif (InterPro 002048) and the IQ calmodulin binding motif (InterPro 000048) are highlighted in gray and red respectively; and the NEDD4L interaction site, which promotes ubiquitination and internalization of  $\text{Na}_v1.7$ , is highlighted in purple<sup>6</sup>.

### Supplementary Table 1:

Markers used to search for common haplotype blocks between the three families. The homozygous block is bounded by a thickened line; het denotes a heterozygous microsatellite marker genotype.

### Supplementary Table 2:

Primers used to amplify and sequence the coding exons and splice sites of *SCN9A*.

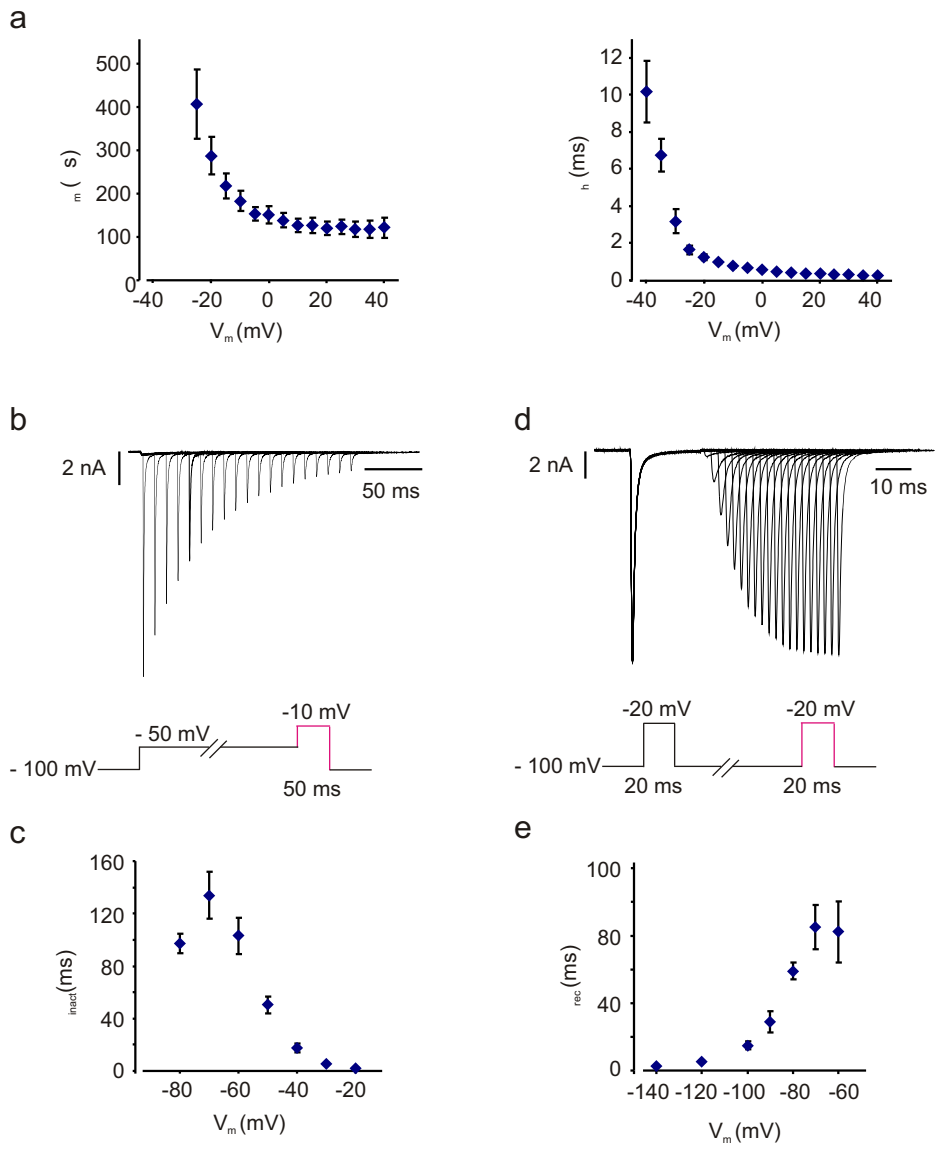

Human Na<sub>v</sub>1.7 (NP\_002968) 1977 aa vs.  
 Mouse Na<sub>v</sub>1.7 (XP\_904764) 1975 aa

92% identity; 95% similarity

|       |                  |                       |                  |                   |                 |                   |
|-------|------------------|-----------------------|------------------|-------------------|-----------------|-------------------|
|       | 10               | 20                    | 30               | 40                | 50              | 60                |
| Human | MAMLPPPGPQSFVHF  | TKQSLALIEQRIAERKSKEPK | EKKDDDEEAPKPS    | SSDLEAGKQLP       |                 |                   |
|       | .....            | .....                 | .....            | .....             | .....           | .....             |
| Mouse | MAMLPPPGPQSFVHF  | TKQSLALIEQRISEEKAKGHK | DEKKDDEEEGPKPS   | SSDLEAGKQLP       |                 |                   |
|       | 10               | 20                    | 30               | 40                | 50              | 60                |
|       | 70               | 80                    | 90               | 100               | 110             | 120               |
| Human | FIYGDIPP         | GMVSEPLEDLDPYYADK     | KTFIVLNK         | GKTIFRFNATPALYML  | SPFSPLRRISI     |                   |
|       | .....            | .....                 | .....            | .....             | .....           | .....             |
| Mouse | FIYGDIPP         | GMVSEPLEDLDPYYADK     | KTFIVLNK         | GKAIFFRFNATPALYML | SPFSPLRRISI     |                   |
|       | 70               | 80                    | 90               | 100               | 110             | 120               |
|       | 130              | 140                   | 150              | 160               | 170             | 180               |
| Human | KILVHSLF         | SMLIMCTILTNCIFMTMNN   | PPDW             | TKNVEY            | TFTGIYTFESL     | VKILARGE          |
|       | .....            | .....                 | .....            | .....             | .....           | .....             |
| Mouse | KILVHSLF         | SMLIMCTILTNCIFMTMSN   | PPDW             | TKNVEY            | TFTGIYTFESL     | LIKILARGE         |
|       | 130              | 140                   | 150              | 160               | 170             | 180               |
|       | 190              | 200                   | 210              | 220               | 230             | 240               |
| Human | FTFLRDP          | WNWLD                 | FVIVFAYL         | TEFVNLGNV         | SALR            | TFRVLRALKTISVIPGL |
|       | .....            | .....                 | .....            | .....             | .....           | .....             |
| Mouse | FTFLRDP          | WNWLD                 | FVIVFAYL         | TEFVNLGNV         | SALR            | TFRVLRALKTISVIPGL |
|       | 190              | 200                   | 210              | 220               | 230             | 240               |
|       | 250              | 260                   | 270              | 280               | 290             | 300               |
| Human | SVKKLSD          | VMILTVFCLSVFALIGL     | QLFMGNLK         | HKCFRNSLENNETLES  | SIMNTLESEEDFR   |                   |
|       | .....            | .....                 | .....            | .....             | .....           | .....             |
| Mouse | SVKKLSD          | VMILTVFCLSVFALIGL     | QLFMGNLK         | HKCFRKDLEQNETLE   | NGHKGYQRKCKVK   |                   |
|       | 250              | 260                   | 270              | 280               | 290             | 300               |
|       | 310              | 320                   | 330              | 340               | 350             | 360               |
| Human | K--YFYYLEGSKDALL | CGFSTDSGQCPEGYTCVK    | I GRNPDYGYTSFDTF | SWAFLALFR         | ML              |                   |
|       | .....            | .....                 | .....            | .....             | .....           | .....             |
| Mouse | TMGYFYYLEGSKDALL | CGFSTDSGQCPEGYECVT    | AGRNPDYGYTSFDTF  | GWAF              | LALFRML         |                   |
|       | 310              | 320                   | 330              | 340               | 350             | 360               |
|       | 370              | 380                   | 390              | 400               | 410             | 420               |
| Human | TQDYWENLYQQT     | LRAAGKTYMIF           | FVVVIFLGSFY      | LINLILAVVAM       | AYEEQNQANIEEAKQ |                   |
|       | .....            | .....                 | .....            | .....             | .....           | .....             |
| Mouse | TQDYWENLYQQT     | LRAAGKTYMIF           | FVVVIFLGSFY      | LINLILAVVAM       | AYEEQNQANIEEAKQ |                   |
|       | 370              | 380                   | 390              | 400               | 410             | 420               |
|       | 430              | 440                   | 450              | 460               | 470             | 480               |
| Human | KELEFQQMLDRLKKE  | QEEAEIAAAAAEYTS       | IRRSRIMGLSESSES  | SETSKLSSKSAKERN   |                 |                   |
|       | .....            | .....                 | .....            | .....             | .....           | .....             |
| Mouse | KELEFQQMLDRLKKE  | QEEAEVVFIIITNTKAK     | QVQRIMGLSESSES   | SETSKLSSKSAKERN   |                 |                   |
|       | 430              | 440                   | 450              | 460               | 470             | 480               |
|       | 490              | 500                   | 510              | 520               | 530             | 540               |
| Human | RRKKKNQK         | LSSGEEKGDAEKLSK       | SESEDSIRRKSFH    | LGVEGHRRAREKRL    | STPNQSP         | LS                |
|       | .....            | .....                 | .....            | .....             | .....           | .....             |
| Mouse | RRKKKKQK         | -LSSGEEKGDDEKLSK      | SGSEESIRKKS      | FH LGVEGHRRAREKRL | STPNQSP         | LS                |
|       | 490              | 500                   | 510              | 520               | 530             | 540               |

|              |                                                               |                       |                       |             |                     |      |
|--------------|---------------------------------------------------------------|-----------------------|-----------------------|-------------|---------------------|------|
|              | 550                                                           | 560                   | 570                   | 580         | 590                 | 600  |
| <b>Human</b> | IRGSLFSARRSSRTSLFSFKGRGRDIGSETEFADDEHSIFGDNESRRGSLFVPHRPQERR  |                       |                       |             |                     |      |
|              | .....,.....,.....                                             |                       |                       |             |                     |      |
| <b>Mouse</b> | IRGSLFSARRSSRTSLFSFKGRGRDLGSETEFADDEHSIFGDNESRRGSLFVPHRPRERR  |                       |                       |             |                     |      |
|              | 550                                                           | 560                   | 570                   | 580         | 590                 | 600  |
|              | 610                                                           | 620                   | 630                   | 640         | 650                 | 660  |
| <b>Human</b> | SSNISQASRSPPMLPVNGKMHSVAVDCNGVVSLVDGRSALMLPNGQLLEGGTTNQIHKRR  |                       |                       |             |                     |      |
|              | .....,.....,.....,.....,.....,.....                           |                       |                       |             |                     |      |
| <b>Mouse</b> | SSNISQASRSPPVLPVNGKMHSVAVDCNGVVSLVDGPSALMLPNGQLLEGGTTNQMRKKRL |                       |                       |             |                     |      |
|              | 610                                                           | 620                   | 630                   | 640         | 650                 | 660  |
|              | 670                                                           | 680                   | 690                   | 700         | 710                 | 720  |
| <b>Human</b> | CSSYLLSEDLNDPNLRQRAMSRASILTNTVEELEEESRQKPPWYRFAHKFLIWNCSFY    |                       |                       |             |                     |      |
|              | :::.....,.....,.....,.....,.....,.....                        |                       |                       |             |                     |      |
| <b>Mouse</b> | SSSYFLSEDLNDPHLRQRAMSRASILTNTVEELEEESRQKPPWYRFAHTFLIWNCSFY    |                       |                       |             |                     |      |
|              | 670                                                           | 680                   | 690                   | 700         | 710                 | 720  |
|              | 730                                                           | 740                   | 750                   | 760         | 770                 | 780  |
| <b>Human</b> | WIKFKKCIYFIVMDPFVDLAITICIVLNTLFMA                             | MEHHPMTEEFKN          | VLAIGNLVFTGIFAA       |             |                     |      |
|              | .....,.....,.....,.....,.....,.....                           |                       |                       |             |                     |      |
| <b>Mouse</b> | WIKFKKFIYFIVMDPFVDLAITICIVLNTLFMA                             | MEHHPMTDEFKN          | VLAVGNLVFTGIFAA       |             |                     |      |
|              | 730                                                           | 740                   | 750                   | 760         | 770                 | 780  |
|              | 790                                                           | 800                   | 810                   | 820         | 830                 | 840  |
| <b>Human</b> | EMVLKLIAMD                                                    | PYEFYQ                | VGWNIFDSLIVTL         | SLVELFLADVE | GLSVLRSFRLLRVFKLAKS | W    |
|              | .....,.....,.....,.....,.....,.....                           |                       |                       |             |                     |      |
| <b>Mouse</b> | EMVLKLIAMD                                                    | PYEFYQ                | VGWNIFDSLIVTL         | SLVELFLADVE | GLSVLRSFRLLRVFKLAKS | W    |
|              | 790                                                           | 800                   | 810                   | 820         | 830                 | 840  |
|              | 850                                                           | 860                   | 870                   | 880         | 890                 | 900  |
| <b>Human</b> | PTLNMLIKIIGNSVGALGN                                           | LTlVLAIIVFIFAVVGMQLFG | KSYKECVCKINDDCTLPRWH  |             |                     |      |
|              | .....,.....,.....,.....,.....,.....                           |                       |                       |             |                     |      |
| <b>Mouse</b> | PTLNMLIKIIGNSVGALGN                                           | LTlVLAIIVFIFAVVGMQLFG | KSYKECVCKINENCKLPRWH  |             |                     |      |
|              | 850                                                           | 860                   | 870                   | 880         | 890                 | 900  |
|              | 910                                                           | 920                   | 930                   | 940         | 950                 | 960  |
| <b>Human</b> | MNDFFHSFLIVFRVLCGE                                            | WIETMWDCEVAGQAM       | CLIVYMMVMVIGNLVVNLNLF | LALLLS      |                     |      |
|              | .....,.....,.....,.....,.....,.....                           |                       |                       |             |                     |      |
| <b>Mouse</b> | MNDFFHSFLIVFRVLCGE                                            | WIETMWDCEVAGQTM       | CLIVYMMVMVIGNLVVNLNLF | LALLLS      |                     |      |
|              | 910                                                           | 920                   | 930                   | 940         | 950                 | 960  |
|              | 970                                                           | 980                   | 990                   | 1000        | 1010                | 1020 |
| <b>Human</b> | SFSSDNLTAIEEDPDANNLQIAVTRIKKGINYVKQTLREFILKAFS                | KPKISREIRQAED         |                       |             |                     |      |
|              | .....,.....,.....,.....,.....,.....                           |                       |                       |             |                     |      |
| <b>Mouse</b> | SFSSDNLTAIEEDTDANNLQIAVARIKRGINYVKQTLREFILKSFS                | KPKGSKDKTKRTAD        |                       |             |                     |      |
|              | 970                                                           | 980                   | 990                   | 1000        | 1010                | 1020 |
|              | 1030                                                          | 1040                  | 1050                  | 1060        | 1070                | 1080 |
| <b>Human</b> | LNTKKENYISNHTLAEMSKGHNFLEKDKISGFGSSVDKHLMEDSDGQSF             | IHNPSLTVTV            |                       |             |                     |      |
|              | :.....,.....,.....,.....,.....,.....                          |                       |                       |             |                     |      |
| <b>Mouse</b> | PNNKRENYISNRTLAEISKDHNFLKEKDKISGFS                            | SSLDKSFMDENDYQSF      | IHNPSLTVTV            |             |                     |      |
|              | 1030                                                          | 1040                  | 1050                  | 1060        | 1070                | 1080 |
|              | 1090                                                          | 1100                  | 1110                  | 1120        | 1130                | 1140 |
| <b>Human</b> | PIAPGESDLENMNAEELSSDSDSEYSKVR                                 | LNRRSSSECSTVDNPLPGE   | GEEAEAEPMNSD          |             |                     |      |
|              | .....,.....,.....,.....,.....,.....                           |                       |                       |             |                     |      |
| <b>Mouse</b> | PIAPGESDLENMNTTELSSDSDSDYKERRNR                               | SSSECSTVDNPLPGE       | -EEAEAEPINAD          |             |                     |      |
|              | 1090                                                          | 1100                  | 1110                  | 1120        | 1130                | 1140 |

|              |                       |                   |               |                       |                     |                       |
|--------------|-----------------------|-------------------|---------------|-----------------------|---------------------|-----------------------|
|              | 1150                  | 1160              | 1170          | 1180                  | 1190                | 1200                  |
| <b>Human</b> | EPEACFTDGCVRRFSCCQVNI | ESGKGKIWWNIRKTCYK | I             | VEHSWFESFIVLMILLSSGAL |                     |                       |
|              | .....                 | .....             | .....         | .....                 | .....               | .....                 |
| <b>Mouse</b> | EPEACFTDGCVRRFPCCQVN  | IDSGKGVVWVTRKTCYR | I             | VEHSWFESFIVLMILLSSGAL |                     |                       |
|              | 1150                  | 1160              | 1170          | 1180                  | 1190                | 1200                  |
|              | 1210                  | 1220              | 1230          | 1240                  | 1250                | 1260                  |
| <b>Human</b> | AFEDIYI               | ERKKTIKI          | I             | ILEYADKIFTYIFILEMLL   | KWIAYGYKTYFTNAWCWLD | FLIVDVS               |
|              | .....                 | .....             | .....         | .....                 | .....               | .....                 |
| <b>Mouse</b> | AFEDIYI               | EKKKTIKI          | I             | ILEYADKIFTYIFILEMLL   | KWVAYGYKTYFTNAWCWLD | FLIVDVS               |
|              | 1210                  | 1220              | 1230          | 1240                  | 1250                | 1260                  |
|              | 1270                  | 1280              | 1290          | 1300                  | 1310                | 1320                  |
| <b>Human</b> | LVTLVANTL             | GYSDLGPIKSLR      | TLRALRPLRALS  | RFEGMRVVV             | NALIGAIP            | SIMNVLLVCL            |
|              | .....                 | .....             | .....         | .....                 | .....               | .....                 |
| <b>Mouse</b> | LVTLVANTL             | GYSDLGPIKSLR      | TLRALRPLRALS  | RFEGMRVVV             | NALIGAIP            | SIMNVLLVCL            |
|              | 1270                  | 1280              | 1290          | 1300                  | 1310                | 1320                  |
|              | 1330                  | 1340              | 1350          | 1360                  | 1370                | 1380                  |
| <b>Human</b> | IFWLIFS               | IMGVNLFA          | GK            | FYECINTTDGSRFPASQ     | VPNRSECFALMNVSQ     | NVRWKNLKVNF           |
|              | .....                 | .....             | .....         | .....                 | .....               | .....                 |
| <b>Mouse</b> | IFWLIFS               | IMGVNLFA          | GK            | FYECVNTTDGSRFSVSQ     | VANRSECFALMNVS      | GNVRWKNLKVNF          |
|              | 1330                  | 1340              | 1350          | 1360                  | 1370                | 1380                  |
|              | 1390                  | 1400              | 1410          | 1420                  | 1430                | 1440                  |
| <b>Human</b> | DNVGLGYLSLLQVATFK     | GW                | TIMYAAVDSVNV  | DKQPKYEYS             | LYMYIYFV            | VFIIFGSFFTL           |
|              | .....                 | .....             | .....         | .....                 | .....               | .....                 |
| <b>Mouse</b> | DNVGLGYLSLLQVATFK     | GW                | MDIMYAAVDSVNV | NAQPIYEYN             | LYMYIYFV            | VFIIFGSFFTL           |
|              | 1390                  | 1400              | 1410          | 1420                  | 1430                | 1440                  |
|              | 1450                  | 1460              | 1470          | 1480                  | 1490                | 1500                  |
| <b>Human</b> | NLFIGV                | IIDNFNQ           | KKKLG         | QDIFMTEEQ             | KKYNNAMKKL          | GSKKPQKPIPRPGNKIQGCIF |
|              | .....                 | .....             | .....         | .....                 | .....               | .....                 |
| <b>Mouse</b> | NLFIGV                | IIDNFNQ           | KKKLG         | QDIFMTEEQ             | KKYNNAMKKL          | GSKKPQKPIPRPGNKIQGCIF |
|              | 1450                  | 1460              | 1470          | 1480                  | 1490                | 1500                  |
|              | 1510                  | 1520              | 1530          | 1540                  | 1550                | 1560                  |
| <b>Human</b> | DLVTNQAFDIS           | IMVLI             | CLNMVTMM      | VEKEG                 | QSQHMT              | EVLYWINVVFII          |
|              | .....                 | .....             | .....         | .....                 | .....               | .....                 |
| <b>Mouse</b> | DLVTNQAFDIT           | IMVLI             | CLNMVTMM      | VEKEG                 | QTDYMS              | FVLYWINVVFII          |
|              | 1510                  | 1520              | 1530          | 1540                  | 1550                | 1560                  |
|              | 1570                  | 1580              | 1590          | 1600                  | 1610                | 1620                  |
| <b>Human</b> | RHYFT                 | VGWNIFDFV         | VVILSIVGMFLAD | LIET                  | YFVSPTL             | FRVIRLARIGRILRLIKGAKG |
|              | .....                 | .....             | .....         | .....                 | .....               | .....                 |
| <b>Mouse</b> | RHYFT                 | VGWNIFDFV         | VVILSIVGMFLA  | EMI                   | EKYFVSPTL           | FRVIRLARIGRILRLIKGAKG |
|              | 1570                  | 1580              | 1590          | 1600                  | 1610                | 1620                  |
|              | 1630                  | 1640              | 1650          | 1660                  | 1670                | 1680                  |
| <b>Human</b> | IRTL                  | L                 | FALMMSL       | PALFN                 | IGLLFLV             | MFIYAIFGMSNFAYVK      |
|              | .....                 | .....             | .....         | .....                 | .....               | .....                 |
| <b>Mouse</b> | IRTL                  | L                 | FALMMSL       | PALFN                 | IGLLFLV             | MFIYAIFGMSNFAYVK      |
|              | 1630                  | 1640              | 1650          | 1660                  | 1670                | 1680                  |



|              |                           |                              |                          |                  |       |       |
|--------------|---------------------------|------------------------------|--------------------------|------------------|-------|-------|
|              | 1690                      | 1700                         | 1710                     | 1720             | 1730  | 1740  |
| <b>Human</b> | CLFQITTSAGWDG             | LLAPILNSKPPDCDPK             | KVHPGSSVEGDCGNP          | SVGIFYFVSYIIISFL |       |       |
|              | .....                     | .....                        | .....                    | .....            | ..... | ..... |
| <b>Mouse</b> | CLFQITTSAGWDG             | LLAPILNSAPPDCDPK             | KVHPGSSVEGDCGNP          | SVGIFYFVSYIIISFL |       |       |
|              | 1690                      | 1700                         | 1710                     | 1720             | 1730  | 1740  |
|              | 1750                      | 1760                         | 1770                     | 1780             | 1790  | 1800  |
| <b>Human</b> | VVVNMYIAVIL               | ENFSVATEESTEPLSEDDFEM        | MFYEVWEKFDPDATQFIEF      | SKLSDFAAAL       |       |       |
|              | .....                     | .....                        | .....                    | .....            | ..... | ..... |
| <b>Mouse</b> | VVVNMYIAVIL               | ENFSVATEESTEPLSEDDFEM        | MFYEVWEKFDPDATQFIEF      | CKLSDFAAAL       |       |       |
|              | 1750                      | 1760                         | 1770                     | 1780             | 1790  | 1800  |
|              | 1810                      | 1820                         | 1830                     | 1840             | 1850  | 1860  |
| <b>Human</b> | DPPLLIAPKNKVQLIAMDL       | PMVSGDRIHCLDILFAF            | TKRVLGESGEMDSLRSQMEERFMS |                  |       |       |
|              | .....                     | .....                        | .....                    | .....            | ..... | ..... |
| <b>Mouse</b> | DPPLLIAPKNKVQLIAMDL       | PMVSGDRIHCLDILFAF            | TKRVLGESGEMDSLRSQMEERFMS |                  |       |       |
|              | 1810                      | 1820                         | 1830                     | 1840             | 1850  | 1860  |
|              | 1870                      | 1880                         | 1890                     | 1900             | 1910  | 1920  |
| <b>Human</b> | ANPSKVSYPITTTTLKRK        | QEDVSATVIQRAYRRYRLRQNVK      | NISSIIYIKDGRDDDLLNK      |                  |       |       |
|              | .....                     | .....                        | .....                    | .....            | ..... | ..... |
| <b>Mouse</b> | ANPSKVSYPITTTTLKRK        | QEDVSATI IQRAYRRYRLRQNVK     | NISSIIYIKDGRDDDLLPNK     |                  |       |       |
|              | 1870                      | 1880                         | 1890                     | 1900             | 1910  | 1920  |
|              | 1930                      | 1940                         | 1950                     | 1960             | 1970  |       |
| <b>Human</b> | KDMAFDNVNENSSPEKTDATSSTTS | PPSYDSVTKPDKEKYEQDRTEKEDK    | KGKDSKESK                |                  |       |       |
|              | .....                     | .....                        | .....                    | .....            | ..... | ..... |
| <b>Mouse</b> | EDIVFDNVNENSSPEKTDATASTIS | PPSYDSVTKPDQEKYETDKTEKEDKEKD | --ESRK                   |                  |       |       |
|              | 1930                      | 1940                         | 1950                     | 1960             | 1970  |       |

| Marker Position | Marker Name    | Family 1 | Family 2 | Family 3 | Caucasian control |
|-----------------|----------------|----------|----------|----------|-------------------|
| 159522955       | D2S1353        | 140      | 156      | het      |                   |
| 159663226       | AC064843GT21   | 190      | 188      | 182      | 195/197           |
| 159880425       | AC010093CA21   | 300      | 294      |          |                   |
| 160040465       | D2S2370        | 88       | 88       | 98       | 91/93             |
| 160085712       | D2S2190        | 227      | 227      | 221      | 221/221           |
| 160145161       | AC008277AC32   | 329      | 317      | 333      | 317/317           |
| 160361795       | AC009506TTA10  | 382      | 382      | 391      | 382/382           |
| 160612804       | D2S156         | 176      | 188      | 170      | 190/190           |
| 160801752       | AC080166GT14   | 172      | 164      | 164      | 166/172           |
| 161070953       | AC092153GT17   | 229      | 235      | 229      | 227/231           |
| 161292227       | AC131754TA13   | 250      | 250      | 244      | 244/266           |
| 161539521       | AC096656GT26   | 220      | 200      | 186      | 215/219           |
| 161801813       | AC073190AC24   | 224      | 228      | 218      | 210/224           |
| 162057568       | AC009299CA22   | 165      | 167      | 165      | 165/169           |
| 162238623       | AC009487GT17   | 192      | 198      | 196      | 196/204           |
| 162445601       | AC062022GT23   | 279      | 279      | 281      | 279/285           |
| 162500221       | AC062066GT17   | 258      | 258      | 258      | 256/258           |
| 162655195       | AC096654AC20   | 293      | 297      | 293      | 295/295           |
| 162765717       | AC092841TA26   | 170      | 174      | 168      | 184/186           |
| 162854397       | AC008063TA16   | 319      | 317      | 319      | 309/325           |
| 162967073       | AC007750TC18   | 232      | 226      | 232      | 228/228           |
| 163014807       | AC007750CA14   | 124      | 126      | 124      | 124/124           |
| 163109452       | AC010876CA20   | 265      | 251      | 239      |                   |
| 163279542       | AC007740AAT    | 379      | 376      | 379      | 376/379           |
| 163351007       | AC007740CA11   | 156      | 156      | 156      | 156/156           |
| 163397817       | AC139719CTAT12 | 231      | 223      | 235      | 225/229           |
| 163536481       | AC011900TG16   | 335      | 335      | 335      | 335/337           |
| 163569424       | AC011900TTCC15 | 255      | 255      | 255      | 255/255           |
| 163659597       | AC104822AC28   | 197      | 197      | 197      | 197/197           |
| 163745705       | AC092632CA12   | 221      | 221      | 219      | 219/225           |
| 163779498       | D2S2380        | 167      | 167      | 167      | 167/169           |
| 163843071       | AC009439CA14   | 285      | 271      | 285      | 281/287           |
| 163882778       | D2S354         | 178      | 178      | 180      | 174/178           |
| 164159039       | AC079258GCA12  | 217      | 203      | 220      | 203/220           |
| 164478035       | AC093727TG16   | 250      | 250      | 248      | 246/250           |
| 164593046       | AC092684GT19   | 216      | 220      | 226      |                   |
| 164701834       | AC016766TG21   | 242      | 256      | 242      | 229/255           |
| 164807829       | AC016766AC17   | 167      | 161      | 167      | 163/163           |
| 164902460       | AC016720ATCC13 | 289      | 289      | 293      | 289/293           |
| 165170192       | AC110078TA12   | 204      | 202      | 206      | 202/204           |
| 165347711       | AC107075AT22   | 219      | 211      | 209      | 205/209           |
| 165609555       | AC019181AC22   | 251      | 253      | 237      | 237/237           |
| 165931794       | D2S382         | 166      | 162      | 150      |                   |
| 166218588       | AC011303AC17   | 252      | 250      | 246      | 246/246           |
| 166462626       | AC019140AC22   | 199      | 211      | 211      | 209/211           |
| 166661437       | D2S2330        | 160      | 156      | 164      | 164/168           |
| 166871148       | AC010127TA12   | 306      | 302      | 288      | 316/316           |
| 166837116       | AC107082GA17   | 212      | 214      | 207      |                   |
| 167075630       | AC108146GA13   | 283      | 283      | 281      | 283/283           |
| 166,993,561     | AC108146TA23   | 209      | 199      | 205      |                   |
| 167190727       | AC074101AAT15  | 251      | 251      | 254      | 257/260           |
| 167277338       | AC074101AT13   | 222      | 222      | 222      | 222/222           |
| 167199765       | AC092538AAAT9  | 257      | 260      | 245      |                   |
| 167519277       | AC104409AC20   | 237      | 249      | 237      | 249/257           |
| 167602054       | AC104069GT20   | 151      | 163      | 153      | 151/161           |

|           |              |            |            |            |         |
|-----------|--------------|------------|------------|------------|---------|
| 167652758 | AC104069AC13 | <b>236</b> | <b>238</b> | <b>236</b> | 238/238 |
| 167835805 | D2S1379      | <b>153</b> | <b>153</b> | <b>157</b> | 153/153 |
| 168016947 | AC093684TG19 | <b>203</b> | <b>193</b> | <b>199</b> | 203/203 |
| 168189596 | AC073050TG23 | <b>320</b> | <b>300</b> | <b>300</b> | 300/300 |
| 168432902 | AC074363TTA9 | <b>265</b> | <b>262</b> | <b>265</b> | 265/273 |
| 168684199 | D2S2345      | <b>153</b> | <b>159</b> | <b>153</b> | 153/153 |
| 168911685 | AC017069CA17 | <b>345</b> | <b>349</b> | <b>349</b> | 343/347 |
| 169099633 | AC084371TG18 | <b>281</b> | <b>287</b> | <b>285</b> | 277/285 |
| 169372884 | AC019086AC21 | <b>241</b> | <b>233</b> | <b>239</b> | 237/241 |
| 169567310 | AC009475TA23 | <b>226</b> | <b>218</b> | <b>230</b> | 222/224 |
| 169609196 | D2S1776      | <b>302</b> | <b>294</b> | <b>302</b> | 294/302 |
| 169734087 | AC069137TG12 | <b>178</b> | <b>178</b> | <b>178</b> | 178/178 |
| 169951962 | AC007556GT17 | <b>239</b> | <b>229</b> | <b>233</b> | 229/229 |
| 170219694 | AC110780AC25 | <b>291</b> | <b>293</b> | <b>289</b> | 289/291 |
| 170471269 | AC016772TG18 | <b>254</b> | <b>258</b> | <b>238</b> | 254/254 |
| 170712148 | AC079151AC13 | <b>205</b> | <b>203</b> | <b>203</b> | 203/205 |
| 170838057 | AC092641TG18 | <b>380</b> | <b>380</b> | <b>380</b> | 380/380 |
| 171191159 | AC012594TG25 | <b>183</b> | <b>199</b> | <b>het</b> |         |

| Coding exon | Forward primer (5'-3')      | Reverse primer (5'-3')      | PCR product (bp) |
|-------------|-----------------------------|-----------------------------|------------------|
| 1           | CCTTTCTTGGCAGGCAAAT         | AAGCCAACAGAACTGACCA         | 400              |
| 2           | AGATGCGTTGATGACATTGG        | CCAGAGTCTTTCAAGGTGCAA       | 377              |
| 3           | TTCAAAGAGACAAAATAGTCTACAAGC | CTGGCAGGAAAAGGAAAAGG        | 295              |
| 4           | AAGTTATAAAGATTTACATGGTGGTTG | ACCCCAGAGGTTTGCTGTTA        | 283              |
| 5           | GAAGCCCCAAACGTAGAAAA        | TCTTTCTTTCAAAGATCAAAGTCA    | 444              |
| 6           | AGGTTACTTAAGGTCATTGATTGA    | AAAAGAGAGCAATGTTTTTAGCA     | 390              |
| 7           | GGACCAGGCCTGAATTTGTA        | TGCAAAGTACTGAACATTCTTT      | 247              |
| 8           | TCCCCCTATAGAAGAAACCTTGA     | GAGTTTCTCCATTCTCAAATAAA     | 353              |
| 9           | CAGATTTGCTCATGCCTGTC        | TCTAGCTGGAGAAGGCCAAG        | 386              |
| 10          | TCATTGTGTAAAGAAAACGATCA     | AAGACATTTTTCTCTAGCATTCTGC   | 498              |
| 11          | GCCAGTGGGTTCAAGTGGTAT       | GCCATGCCTGAGCTATGTAA        | 488              |
| 12          | TTGAACCCAGCAATCTAGGC        | TGTGCCTATTTAAGGTTGACCA      | 330              |
| 13          | TTTCAATATTAGAATGCCTGACTGA   | TGAAATGACAATGATGACAATAAAA   | 396              |
| 14          | TGATGAGCACTGACAGGACA        | TGCAAAACCAAAGAAATACCC       | 467              |
| 15          | TGCTTTACCCTTTGAACAAAAA      | CATCACAAAATAATTTCCACAGAGA   | 500              |
| 16          | CCTGTCTCCCTATTTCTCTACCC     | TGCAATGTTAAGAAGAAGTATGACAA  | 621              |
| 17          | TTTTTCATAACTTTGCATGAGTCTG   | CGTTAAGACAAAACCCAGAA        | 291              |
| 18          | TGAGGGAGTATCACAGAAAGCA      | AGGTAACAACCTTGCCATGA        | 348              |
| 19          | CAGCTGGCCCATGTCAATA         | TTCACAACACACAGTAAGAATAAATCC | 356              |
| 20          | TGTTGAGTTGCTTTTAGTGAGTTT    | TCATAATTTCTACATACCCATTGTTTT | 300              |
| 21          | TGTCTGCATGGCATTCTTT         | AAGAATAACTTATATCCTTCGTCCAA  | 431              |
| 22          | CAGACAAAACCTCTGTTTATGGCTATT | TGAGTCCCAAGGGCTTCAT         | 228              |
| 23          | CCTCAACAATGCTATGGCTTC       | TTGTTTTCTGTGCAAAAATGAAT     | 463              |
| 24          | CTGTGTTTGGAGACCCATGTT       | TCCAGAAATTAAGATGTGCATT      | 378              |
| 25          | ATTCCTCGACCAGGGGTAAA        | TTCAGCATATACTTCCTTGAGCA     | 498              |
| 26A         | TTGAATTCATAAGAAATGAGTTGACA  | CAGTCGGGTGGCTTACTGTT        | 476              |
| 26B         | GACCTTTGGCAACAGTATGATT      | TTTGAAGGATTTGCAGACA         | 577              |
| 26C         | ACCGGATCCATTGTCTTGA         | ACAGGCTGTAACAATATATCAAAAA   | 500              |
